# Supplementary material for: Efficient oxygen evolution reaction from iron-molybdenum nitride/molybdenum oxide heterostructured composites
Source: Royal Society of Chemistry journal article supplement (doi:10.1039/d3dt01295f), 2023-01-01
Supplement: d3dt01295f1.pdf [file d3dt01295f1.pdf]

## Supporting information

### Efficient oxygen evolution reaction from iron-molybdenum nitride/molybdenum oxide heterostructured composites

Aijian Wang,<sup>\*a</sup> Yuqin Dou<sup>a</sup>, Xin Yang<sup>a</sup>, Qi Wang<sup>a</sup>, M. Shire Sudi<sup>a</sup>, Long Zhao<sup>a</sup>,  
Danhong Shang<sup>b</sup>, Weihua Zhu<sup>a</sup>, Jinshen Ren<sup>a</sup>

<sup>a</sup> School of Chemistry & Chemical Engineering, Jiangsu University, Zhenjiang  
212013, P.R. China

<sup>b</sup> School of Energy & Power Engineering, Jiangsu University, Zhenjiang 212013,  
P.R. China

Corresponding Author. Tel: +86-511-88791928. E-mail: wajujs@ujs.edu.cn

## Experimental section

### Characterization

X-ray diffraction (XRD) pattern was recorded in a XD-3 diffractometer with Cu K $\alpha$  radiation. Transmission electron microscopy (TEM) and scanning electron microscopy (SEM) of the samples were performed in a JEM-2100 HR, JEOL system), and a Model S4800, Hitachi, respectively. X-ray photoelectron spectroscopy (XPS) was conducted on a RBD upgraded PHI-5000C ESCA spectrometer.

### Electrochemical measurements

All electrochemical measurements including oxygen evolution reaction were performed on a CHI 614E electrochemical workstation (CH Instrument, China) in 1.0 M KOH solution. The sample covered CFP is employed as the working electrode, a Pt gauze (1  $\times$  1 cm<sup>2</sup>) as the counter electrode and a mercury/mercury oxide electrode (MOE) as the reference electrode. The long-term stability of the samples was also examined by using the same electrolyzer. To prepare the working electrode, the catalysts (2 mg) and Nafion solution (5wt%, 40  $\mu$ L) were dispersed in CH<sub>3</sub>CH<sub>2</sub>OH (0.5 mL), then the solution was sonicated for 1.0 h to give the homogeneous ink. Subsequently, the well-mixed suspension (100  $\mu$ L) was loaded onto CFP. The obtained electrode was then dried naturally at room temperature and retained for use. The measured potential in this work has been calibrated with the reversible hydrogen electrode potential (RHE) based on Nernst equations. The measured LSV data were corrected by the following equation:  $E_{\text{compensated}} = E_{\text{measured}} - iR$  (R represents the series resistance determined by EIS). The electrochemical impedance spectroscopy (EIS) measurement was recorded in the frequencies ranging from 0.01 Hz to 100 KHz with an amplitude of 1 mV. The double-layer capacitance of the as-synthesized samples is determined by the cyclic voltammograms with different scan rates (20, 40, 60, 80, and 100 mV/s) in the scope of 0.1-0.2 V vs. RHE. The oxygen quantification analysis was recorded in a gas chromatography instrument. The turnover frequencies (TOFs) per metal site are calculated based on the hypothesis that all the metal atoms in the catalysts formed active site and all of them were accessible to the electrolyte.[1] The following formula was applied to calculate the TOFs per active site in the as-prepared

samples:

TOFs = (#total oxygen turnover/cm<sup>2</sup> geometric area)/(#active sites/cm<sup>2</sup> geometric area); #O<sub>2</sub> = (J×N<sub>A</sub>)/(4F×1000)

where the J represents the current density, N<sub>A</sub> is the the Avogadro's number (6.02×10<sup>23</sup>), and F is the Farada constant (96485 C mol<sup>-1</sup>). The metal loading of the as-prepared samples is determined by the ICP measurements. It is noted that the number of practical active sites should be lower than the theoretical value.

### **Preparation of Mo<sub>5</sub>N<sub>6</sub>/MoO<sub>3</sub> catalyst**

To prepare Mo<sub>5</sub>N<sub>6</sub>/MoO<sub>3</sub> composite, (NH<sub>4</sub>)<sub>2</sub>MoO<sub>4</sub> (1.23 g) and C<sub>2</sub>H<sub>4</sub>N<sub>4</sub> (0.1 g) were well dispersed in CH<sub>3</sub>CH<sub>2</sub>OH (20 mL) and deionized water (20 mL) by sonicating in an ultrasonic bath for 1 h. The mixture was transferred into 100 mL Teflon-lined stainless-steel autoclave that was heated at 160 °C for 12 h to afford the desired precursors. The obtained mixture was positioned in an alumina boat and heated at 550 °C for 3 h at a rate of 5 °C/min in a N<sub>2</sub> flow. After cooling down to room temperature, the final Mo<sub>5</sub>N<sub>6</sub>/MoO<sub>3</sub> composite was obtained by washing with ultrapure water and CH<sub>3</sub>CH<sub>2</sub>OH.

### **Preparation of Mo<sub>5</sub>N<sub>6</sub> catalyst**

The Mo<sub>5</sub>N<sub>6</sub> catalyst was fabricated by annealing precursor (NH<sub>4</sub>)<sub>2</sub>MoO<sub>4</sub> (1.23 g) in pure ammonia atmosphere under the final conditions of 550 °C, 5 °C min<sup>-1</sup>, and hold for 5 h. After cooling down to room temperature, the final Mo<sub>5</sub>N<sub>6</sub> was obtained by washing with ultrapure water and CH<sub>3</sub>CH<sub>2</sub>OH.

### **Preparation of MoO<sub>3</sub> catalyst**

To prepare MoO<sub>3</sub> electrocatalyst, (NH<sub>4</sub>)<sub>2</sub>MoO<sub>4</sub> (1.23 g) was well dispersed in CH<sub>3</sub>CH<sub>2</sub>OH (20 mL) and deionized water (20 mL) by sonicating in an ultrasonic bath for 1 h. The mixture was transferred into 100 mL Teflon-lined stainless-steel autoclave that was heated at 160 °C for 12 h to afford the desired precursors. The obtained mixture was positioned in an alumina boat and heated at 550 °C for 3 h at a rate of 5 °C/min in a N<sub>2</sub> flow. After cooling down to room temperature, the final MoO<sub>3</sub> was obtained by washing with ultrapure water and CH<sub>3</sub>CH<sub>2</sub>OH.

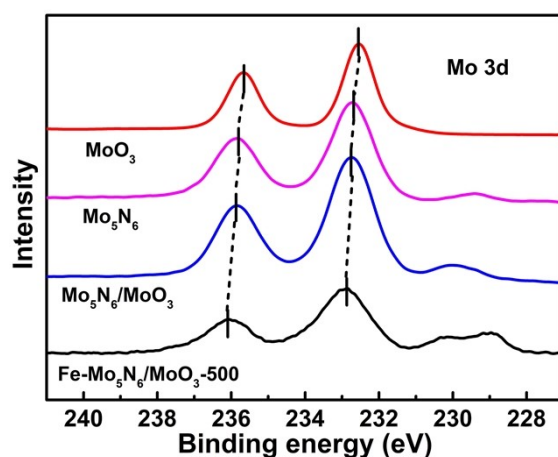

**Figure S1.** High resolution XPS spectra of Mo 3d for the as-prepared samples.

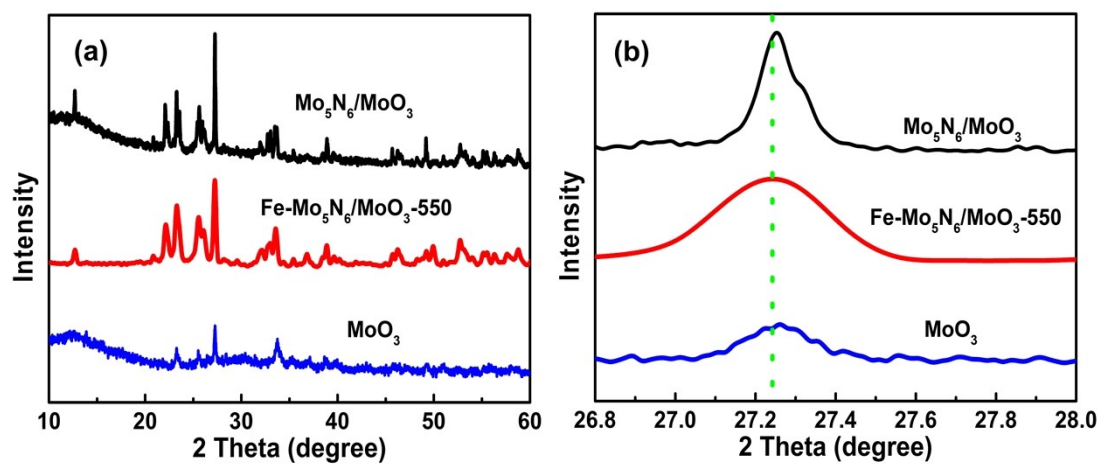

**Figure S2.** (a) XRD patterns and the enlarged image in the region of  $26.8^{\circ}$ - $28.0^{\circ}$  for the as-prepared samples.

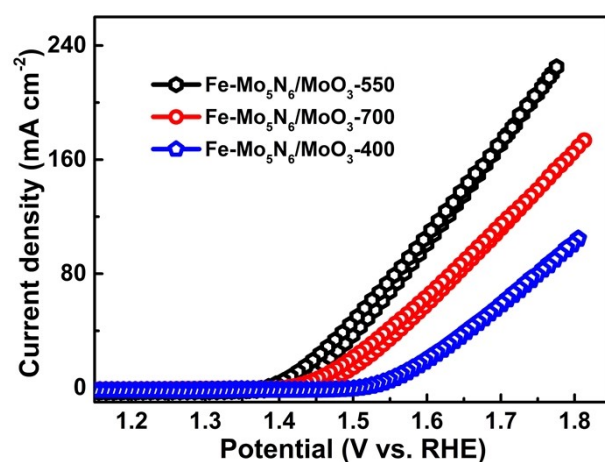

**Figure S3.** CV polarization curves of the as-prepared samples.

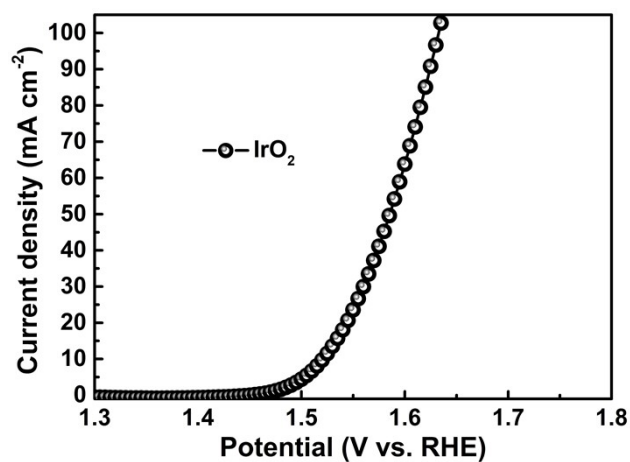

Figure S4. OER polarization curve of commercial  $\text{IrO}_2$ .

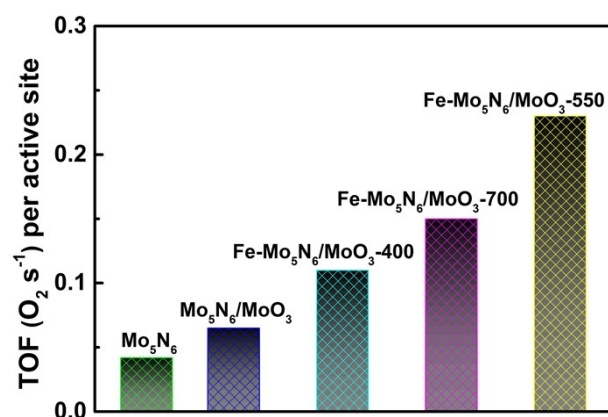

Figure S5. TOF values of the as-prepared samples for OER.

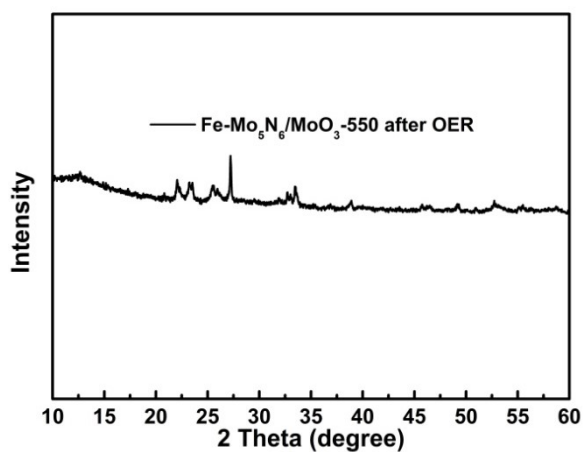

Figure S6. XRD pattern of  $\text{Fe-Mo}_5\text{N}_6/\text{MoO}_3\text{-550}$  after OER.

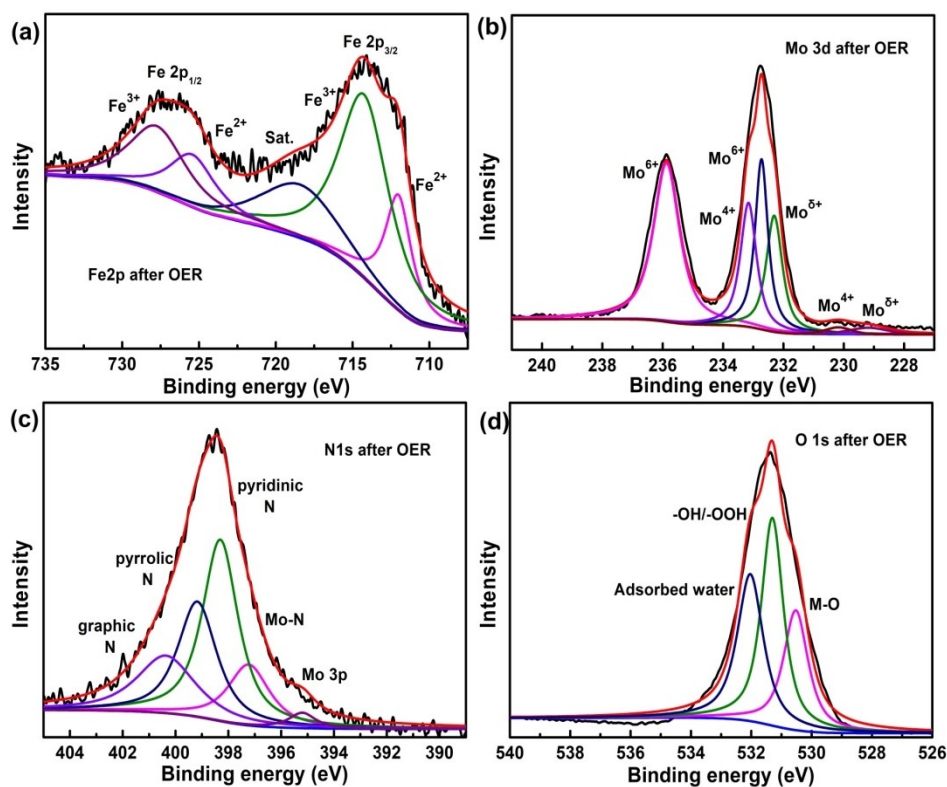

**Figure S7.** High resolution XPS spectra of (a) Fe 2p, (b) Mo 3d, (c) N 1s and (d) O 1s for Fe-Mo<sub>5</sub>N<sub>6</sub>/MoO<sub>3</sub>-550 after OER.

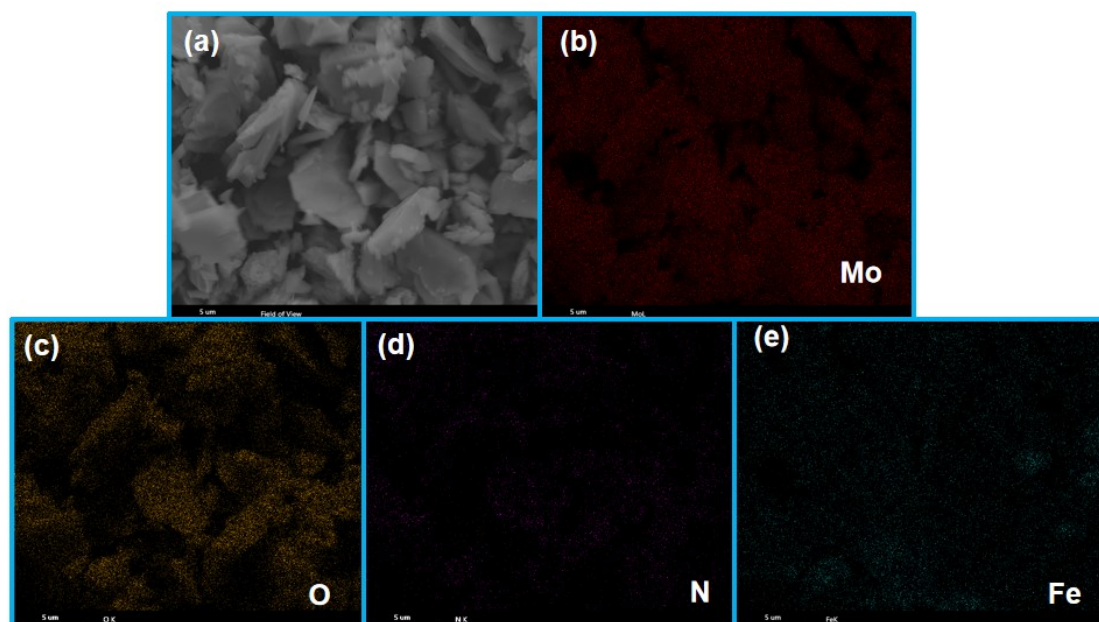

**Figure S8.** (a) SEM image, and the corresponding elemental mapping images of (b) Mo, (c) O, (d) N and (e) Fe for Fe-Mo<sub>5</sub>N<sub>6</sub>/MoO<sub>3</sub>-550 after OER.

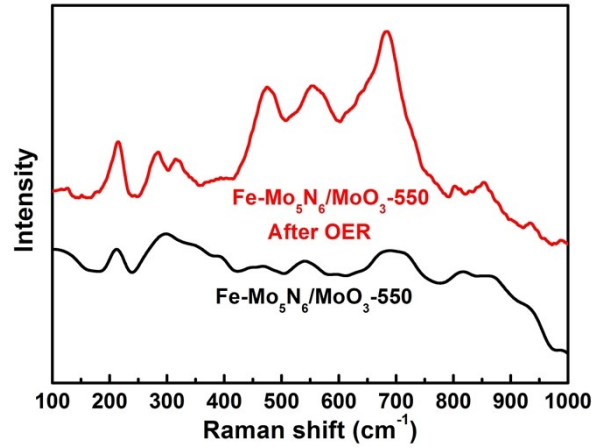

Figure S9. Raman spectra of Fe-Mo<sub>5</sub>N<sub>6</sub>/MoO<sub>3</sub>-550 before and after OER.

For Fe-Mo<sub>5</sub>N<sub>6</sub>/MoO<sub>3</sub>-550, some new peaks appeared after OER, which can be ascribed to the typical Raman vibrational peaks of the generated Fe oxides/oxy(hydroxides) during OER process.[1-5]

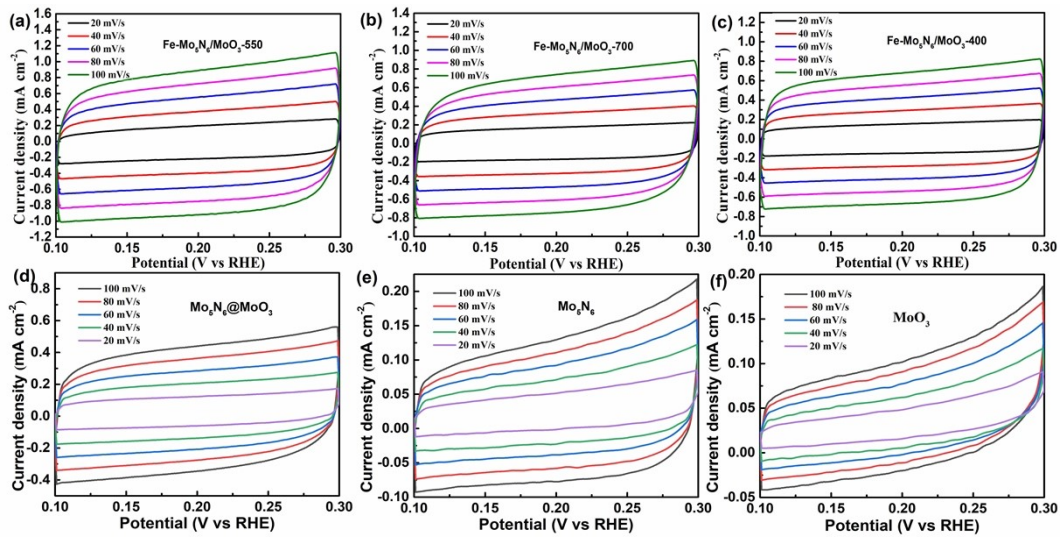

Figure S10. CV curves of the samples at different scan rates.

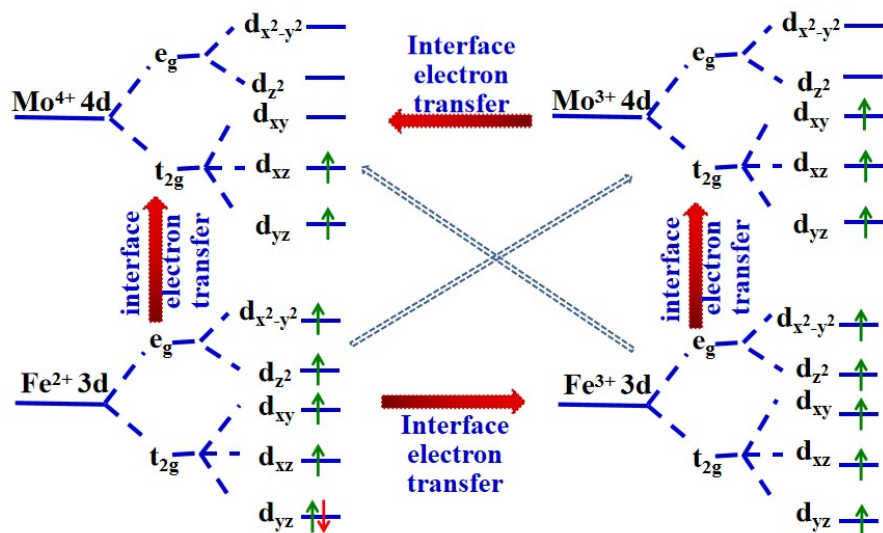

Figure S11. Systematic representation of electronic configuration in the case of Fe<sup>2+</sup>, Fe<sup>3+</sup>, Mo<sup>3+</sup> and Mo<sup>4+</sup> and possible electron transfer. Mo<sup>6+</sup> is not presented in this case. The partial electron transfer from the electron-rich t<sub>2g</sub> d-orbitals (Fe<sup>2+</sup>, Fe<sup>3+</sup>, Mo<sup>3+</sup> and Mo<sup>4+</sup>) to the electron-deficient t<sub>2g</sub> d-orbitals (Mo<sup>6+</sup>) can be occurred through the bridging O<sup>2-</sup> at the interface, since the π-symmetry t<sub>2g</sub> d-orbitals of Mo<sup>6+</sup> are fully unoccupied.



**Table S1.** Comparison of catalytic activity for OER on different catalysts.

| Catalyst                                                                            | Overpotential<br>at 10 mA·cm <sup>-2</sup><br>( $\eta_{10}$ , mV vs. RHE) | Overpotential<br>at 100 mA·cm <sup>-2</sup><br>( $\eta_{100}$ , mV vs. RHE) | Reference        |
|-------------------------------------------------------------------------------------|---------------------------------------------------------------------------|-----------------------------------------------------------------------------|------------------|
| MoO <sub>3</sub> /Ni-NiO                                                            | /                                                                         | 347                                                                         | 1                |
| LaFe <sub>x</sub> Ni <sub>1-x</sub> O <sub>3</sub>                                  | 302                                                                       | /                                                                           | 6                |
| NiO@MoO <sub>3</sub> /VC                                                            | 280                                                                       | /                                                                           | 7                |
| Fe <sub>2</sub> Ni-BPTC                                                             | 365                                                                       | /                                                                           | 8                |
| NiFe LDH                                                                            | 300                                                                       | /                                                                           | 9                |
| P-MoO <sub>3</sub> FCL MXene/NF                                                     | 179                                                                       | /                                                                           | 10               |
| S-NiFe <sub>2</sub> O <sub>4</sub> /NF                                              | 267                                                                       | /                                                                           | 11               |
| Ti <sub>3</sub> C <sub>2</sub> @MoO <sub>3</sub>                                    | 190                                                                       | /                                                                           | 12               |
| NiFe <sub>2</sub> O <sub>4</sub>                                                    | 381                                                                       | /                                                                           | 13               |
| ZIF67@MoO <sub>3</sub> NSs@NF                                                       | 178                                                                       | /                                                                           | 14               |
| Ni <sub>0.65</sub> Fe <sub>0.35</sub> P                                             | 270                                                                       | /                                                                           | 15               |
| Fe-doped MoO <sub>2</sub> /MoO <sub>3</sub>                                         | /                                                                         | 310                                                                         | 16               |
| NiFeLDH/CNT                                                                         | 308                                                                       | /                                                                           | 17               |
| Ni(PO <sub>3</sub> ) <sub>2</sub> -MoO <sub>3</sub> /NF                             | 234                                                                       | /                                                                           | 18               |
| Co <sub>3</sub> O <sub>4</sub> /MoO <sub>3</sub> /g-C <sub>3</sub> N <sub>4</sub>   | 206                                                                       | /                                                                           | 19               |
| NiO@MoO <sub>3</sub> /VC                                                            | 280                                                                       | /                                                                           | 20               |
| Mo-doped Ni <sub>3</sub> Fe/Ni <sub>3</sub> FeN                                     | 240                                                                       | /                                                                           | 21               |
| Co-Mo-N@Ag                                                                          | 234                                                                       | 346                                                                         | 22               |
| Co-NiMoN-400 NRs                                                                    | 294                                                                       | 367                                                                         | 23               |
| Ni/MoN@NCNT/CC                                                                      | 252                                                                       | 368                                                                         | 24               |
| Ni <sub>3</sub> FeN                                                                 | 223                                                                       | /                                                                           | 25               |
| CuMo <sub>2</sub> ON@NG                                                             | 180                                                                       | /                                                                           | 26               |
| Ni <sub>3</sub> N-NiMoN                                                             | 227                                                                       | > 340                                                                       | 27               |
| NiMoN                                                                               | 202                                                                       | > 350                                                                       | 28               |
| Mo-N-CNT                                                                            | 344                                                                       | /                                                                           | 29               |
| Ni/Ni <sub>0.2</sub> Mo <sub>0.8</sub> N/MoO <sub>3</sub>                           | 252                                                                       | > 370                                                                       | 30               |
| CoMoNx-500 NSAs/NF                                                                  | 231                                                                       | > 315                                                                       | 31               |
| Co/Ce-Ni <sub>3</sub> S <sub>2</sub> /NF                                            | 286 ( $\eta_{20}$ )                                                       | > 370                                                                       | 32               |
| Fe, O-Ni <sub>2</sub> P                                                             | 210                                                                       | /                                                                           | 33               |
| NiFe-codoped PCN                                                                    | 270                                                                       | /                                                                           | 34               |
| Fe-doped Ni <sub>3</sub> Se <sub>4</sub>                                            | 225                                                                       | /                                                                           | 35               |
| Fe doped NiSe <sub>2</sub>                                                          | 227                                                                       | /                                                                           | 36               |
| NiFe-W <sub>18</sub> O <sub>49</sub>                                                | 325                                                                       | /                                                                           | 37               |
| Mo-doped CoP <sub>2</sub>                                                           | 220                                                                       | 306                                                                         | 38               |
| Ni <sub>3</sub> S <sub>2</sub> /MoS <sub>2</sub> /20g-C <sub>3</sub> N <sub>4</sub> | 183                                                                       | /                                                                           | 39               |
| FeO <sub>x</sub> -MoP@MWCNTs-                                                       | 229                                                                       | > 330                                                                       | 40               |
| 2                                                                                   |                                                                           |                                                                             |                  |
| CoSe@NiSe <sub>2</sub> @MoS <sub>2</sub>                                            | 170                                                                       | > 370                                                                       | 41               |
| <b>Fe-Mo<sub>5</sub>N<sub>6</sub>/MoO<sub>3</sub>-550</b>                           | <b>201</b>                                                                | <b>373</b>                                                                  | <b>This work</b> |
| <b>Fe-Mo<sub>5</sub>N<sub>6</sub>/MoO<sub>3</sub>-550</b>                           | <b>216 (<math>\eta_{20}</math>)</b>                                       | <b>373</b>                                                                  | <b>This work</b> |

## References

1. X. Li, Y. Wang, J. Wang, Y. Da, J. Zhang, L. Li, C. Zhong, Y. Deng, X. Han, W. Hu, Sequential Electrodeposition of Bifunctional Catalytically Active Structures in  $\text{MoO}_3/\text{Ni-NiO}$  Composite Electrocatalysts for Selective Hydrogen and Oxygen Evolution, *Adv. Mater.* 2020, 32, 2003414.
2. C. T. Moi, S. Bhowmick, M. Qureshi, Hierarchical  $\text{FeO(OH)-CoCeV (Oxy)hydroxide}$  as a Water Cleavage Promoter, *ACS Appl. Mater. Interfaces* 2021, 13, 51151–51160.
3. H. Tang, L. Lv, H. Xian, L. Ran, B. Chen, Y. Fu, Y. Wu, M. Fan, H. Wan, H. Wang, Interfacial electronic coupling in  $\text{Mn}_3\text{O}_4/\text{C}@\text{FeOOH}$  nano-octahedrals regulates intermediate adsorption for highly efficient oxygen evolution reaction, *Appl. Surf. Sci.*, 2023, 612, 155951.
4. S. Chandrasekaran, E. J. Kim, J. S. Chung, C. R. Bowen, B. Rajagopalan, V. Adamaki, R. D. K. Misrac, S. H. Hur, High performance bifunctional electrocatalytic activity of a reduced graphene oxide–molybdenum oxide hybrid catalyst, *J. Mater. Chem. A*, 2016, 4, 13271-13279.
5. C. Pi, X. Li, X. Zhang, H. Song, Y. Zheng, B. Gao, A. Kızılaslan, P. K. Chu, K. Huo, In-Plane Mott–Schottky Effects Enabling Efficient Hydrogen Evolution from  $\text{Mo}_5\text{N}_6\text{-MoS}_2$  Heterojunction Nanosheets in Universal-pH Electrolytes, *Small*, 2022, 18, 2201137.
6. H. Wang, J. Wang, Y. Pi, Q. Shao, Y. Tan, X. Huang, Double Perovskite  $\text{LaFe}_x\text{Ni}_{1-x}\text{O}_3$  Nanorods Enable Efficient Oxygen Evolution Electrocatalysis. *Angew. Chem. Int. Ed.* 2019, 58, 2316-2320.
7. R. Illathvalappil, L. George, S. Kurungot, Coexisting Few-Layer Assemblies of  $\text{NiO}$  and  $\text{MoO}_3$  Deposited on Vulcan Carbon as an Efficient and Durable Electrocatalyst for Water Oxidation, *ACS Appl. Energy Mater.* 2019, 2, 4987–4998.
8. X. L. Wang, L. Z. Dong, M. Qiao, Y. J. Tang, J. Liu, Y. Li, S. L. Li, J. X. Su, Y. Q. Lan, Exploring the Performance Improvement of Oxygen Evolution Reaction in Stable Bimetal -Organic Framework System. *Angew. Chem. Int. Ed.* 2018, 57, 9660-9664.
9. F. Song and X. Hu, Exfoliation of Layered Double Hydroxides for Enhanced Oxygen Evolution Catalysis. *Nat. Commun.* 2014, 5, 4477.
10. M. Li, R. Sun, Y. Li, J. Jiang, W. Xu, H. Cong, S. Han, The 3D porous “celosia”

- heterogeneous interface engineering of layered double hydroxide and P-doped molybdenum oxide on MXene promotes overall water-splitting, *Chem. Eng. J.* 2022, 431, 133941.
11. J. Liu, D. Zhu, T. Ling, A. Vasileff, S. Z. Qiao, S-NiFe<sub>2</sub>O<sub>4</sub> Ultra-small Nanoparticle Built Nanosheets for Efficient Water Splitting in Alkaline and Neutral pH. *Nano Energy* 2017, 40, 264-273.
  12. I. Ashraf, S. Ahmad, S. Rizwan, M. Iqbal, Fabrication of Ti<sub>3</sub>C<sub>2</sub>@MoO<sub>3</sub> nanocomposite as an electrode material for highly efficient and durable water splitting system, *Fuel*, 2021, 299, 120928.
  13. V. Maruthapandian, M. Mathankumar, V. Saraswathy, B. Subramanian, S. Muralidharan, A Study of Oxygen Evolution Reaction Catalytic Behavior of Co<sub>x</sub>Ni<sub>1-x</sub>Fe<sub>2</sub>O<sub>4</sub> in Alkaline Medium. *ACS Appl. Mater. Interfaces.* 9 (2017) 13132-3141.
  14. X. Wei, Y. Chai, N. Liu, S. Qiao, Y. Fu, S. Chong, ZIF67@MoO<sub>3</sub> NSs@NF composite electrocatalysts reinforced by chemical bonds and oxygen vacancy for efficient oxygen evolution reaction and overall water-splitting, *Int. J. Hydrogen Energy*, 2022, 47, 9606-9615.
  15. Z. Liu, G. Zhang, K. Zhang, H. Liu, J. Qu, Facile Dispersion of Nanosized NiFeP for Highly Effective Catalysis of Oxygen Evolution Reaction. *ACS Sustainable Chem. Eng.* 2018, 6, 7206-7211.
  16. J. Chen, Q. Zeng, X. Qi, B. Peng, L. Xu, C. Liu, T. Liang, High-performance bifunctional Fe-doped molybdenum oxide-based electrocatalysts with in situ grown epitaxial heterojunctions for overall water splitting, *Int. J. Hydrogen Energy*, 2020, 45, 24828-24839.
  17. M. Gong, Y. Li, H. Wang, Y. Liang, J. Z. Wu, J. Zhou, J. Wang, T. Regier, F. Wei, H. Dai, An Advanced Ni-Fe Layered Double Hydroxide Electrocatalyst for Water Oxidation. *J. Am. Chem. Soc.* 135 (2013) 8452-8455.
  18. K. Li, J. Ma, X. Guan, H. He, M. Wang, G. Zhang, F. Zhang, X. Fan, W. Peng, Y. Li, 3D self-supported Ni(PO<sub>3</sub>)<sub>2</sub>-MoO<sub>3</sub> nanorods anchored on nickel foam for highly efficient overall water splitting, *Nanoscale*, 2018, 10, 22173-22179.
  19. I. Ahmed, R. Biswas, R. A. Patil, K. K. Halder, H. Singh, B. Banerjee, B. Kumar, Y. Ma,

- K. K. Haldar, Graphitic Carbon Nitride Composites with MoO<sub>3</sub>-Decorated Co<sub>3</sub>O<sub>4</sub> Nanorods as Catalysts for Oxygen and Hydrogen Evolution, *ACS Appl. Nano Mater.* 2021, 4, 12672–12681.
20. R. Illathvalappil, L. George, S. Kurungot, Coexisting Few-Layer Assemblies of NiO and MoO<sub>3</sub> Deposited on Vulcan Carbon as an Efficient and Durable Electrocatalyst for Water Oxidation, *ACS Appl. Energy Mater.* 2019, 2, 4987–4998.
21. Z. Shao, J. Sun, Z. Yan, K. Huang, F. Tian, H. Xue, Q. Wang, Dual-modulation of phase and electronic structure in hierarchical Ni<sub>3</sub>Fe/Ni<sub>3</sub>FeN catalyst by Mo-doping to achieve efficient oxygen evolution reaction, *Appl. Surf. Sci.* 2020, 529, 147172.
22. F. Jiao, J. Wang, Y. Lin, J. Li, X. Jing, Y. Gong, Silver nanoparticles decorated Co-Mo nitride for efficient water splitting, *Appl. Surf. Sci.* 2021, 553, 149440.
23. Z. Yin, Y. Sun, Y. Jiang, F. Yan, C. Zhu, Y. Chen, Hierarchical Cobalt-Doped Molybdenum–Nickel Nitride Nanowires as Multifunctional Electrocatalysts, *ACS Appl. Mater. Interfaces* 2019, 11, 27751–27759
24. P. Wang, J. Qi, C. Li, X. Chen, T. Wang, C. Liang, N-doped Carbon Nanotubes Encapsulating Ni/MoN Heterostructures Grown on Carbon Cloth for Overall Water Splitting, *ChemElectroChem* 2020, 7, 745-752.
25. Y. Wang, C. Xie, D. Liu, X. Huang, J. Huo, S. Wang, Nanoparticle-Stacked Porous Nickel–Iron Nitride Nanosheet: A Highly Efficient Bifunctional Electrocatalyst for Overall Water Splitting, *ACS Appl. Mater. Interfaces* 2016, 8, 18652–18657.
26. J. Balamurugan, T. T. Nguyen, N. H. Kim, D. H. Kim, J. H. Lee, Novel core-shell CuMo-oxynitride@N-doped graphene nanohybrid as multifunctional catalysts for rechargeable zinc-air batteries and water splitting, *Nano Energy*, 2021, 85, 105987.
27. A. Wu, Y. Xie, H. Ma, C. Tian, Y. Gu, H. Yan, X. Zhang, G. Yang, H. Fu, Integrating the active OER and HER components as the heterostructures for the efficient overall water splitting, *Nano Energy*, 2018, 44, 353–363.
28. Y. Zhang, B. Zhang, Z. Yin, X. Ma, Y. Zhou, Bimetallic Ni–Mo nitride@N-doped C as highly active and stable bifunctional electrocatalysts for full water splitting, *New J. Chem.*, 2022, 46, 11893-11901.
29. S. Ji, W. Chen, Z. Zhao, X. Yu, H. S. Park, Molybdenum oxynitride nanoparticles on

- nitrogen doped CNT architectures for the oxygen evolution reaction, *Nanoscale Adv.*, 2020,2, 5659-5665.
30. R. Li, S. Li, M. Lu, Y. Shi, K. Qu, Y. Zhu, Energy-efficient hydrogen production over a high-performance bifunctional NiMo-based nanorods electrode, *J. Colloid Interf. Sci.*, 2020, 571, 48–54.
  31. Y. Lu, Z. Li, Y. Xu, L. Tang, S. Xu, D. Li, J. Zhu, D. Jiang, Bimetallic Co-Mo nitride nanosheet arrays as high-performance bifunctional electrocatalysts for overall water splitting, *Chem. Eng. J.* 2021, 411, 128433.
  32. X. Wu, T. Zhang, Ji. Wei, P. Feng, X. Yan, Y. Tang, Facile synthesis of Co and Ce dual-doped Ni<sub>3</sub>S<sub>2</sub> nanosheets on Ni foam for enhanced oxygen evolution reaction, *Nano Res.* 2020, 13(8), 2130–2135.
  33. B. Xua, X. Yang, Q. Fang, L. Dua, Y. Fu, Y. Sun, Q. Liu, Q. Lin, C. Li, Anion-cation dual doping: An effective electronic modulation strategy of Ni<sub>2</sub>P for high-performance oxygen evolution, *J. Energy Chem.*, 2020, 48, 116–121.
  34. C. Wu, X. Zhang, Z. Xia, M. Shu, H. Li, X. Xu, R. Si, A. I. Rykov, J. Wang, S. Yu, S. Wang, G. Sun, Insight into the role of Ni–Fe dual sites in the oxygen evolution reaction based on atomically metal-doped polymeric carbon nitride, *J. Mater. Chem. A*, 2019, 7, 14001–14010.
  35. J. Du, Z. Zou, C. Liu, C. Xu, Hierarchical Fe-doped Ni<sub>3</sub>Se<sub>4</sub> ultrathin nanosheets as an efficient electrocatalyst for oxygen evolution reaction, *Nanoscale*, 2018, 10, 5163–5170.
  36. Y. Du, G. Cheng, W. Luo, Colloidal synthesis of urchin-like Fe doped NiSe<sub>2</sub> for efficient oxygen evolution, *Nanoscale*, 2017, 9, 6821–6825.
  37. W. Hu, M. Tian, K. Zeng, J. Yan, J. Zhou, J. Zhang, M. H. Rummeli, H. Wang, R. Yang, Tuning the Electronic Structure of W<sub>18</sub>O<sub>49</sub> via Dual Doping for Efficient Oxygen Evolution Reaction, *ACS Appl. Energy Mater.* 2022, 5, 3208–3216.
  38. A. Wang, X. Chen, L. Cheng, X. Shen, W. Zhu, L. Li, J. Pang, Insights into the synergistic effect of multi-walled carbon nanotube decorated Mo-doped CoP<sub>2</sub> hybrid electrocatalysts toward efficient and durable overall water splitting, *J. Mater. Chem. A*, 2020, 8, 17621–17633.

39. H. Wang, J. Ren, A. Wang, Q. Wang, W. Zhao, L. Zhao, Synergistic catalysis of graphitic carbon nitride supported bimetallic sulfide nanostructures for efficient oxygen generation, *Chem. Commun.*, 2022, 58, 9202–9205.
40. A. Wang, X. Shen, Y. Wang, Q. Wang, L. Cheng, X. Chen, C. Lv, W. Zhu, L. Li, Rational design of FeO<sub>x</sub>-MoP@MWCNT composite electrocatalysts toward efficient overall water Splitting, *Chem. Commun.*, 2021, 57, 6149–6152.
41. X. Shen, M. Zhang, M. S. Sudi, W. Zhao, Q. Wang, J. Ren, L. Zhao, A. Wang, W. Zhu, Synergistic optimization promoted overall water splitting of CoSe@NiSe<sub>2</sub>@MoS<sub>2</sub> heterostructured composites, *Chem. Commun.*, 2021, 57, 12516-12519.
